# Supplementary material for: Partial alkali-metal ion extraction from K0.8(Li0.27Ti1.73)O4 using PTFE as an extraction reagent
Source: Royal Society of Chemistry journal article supplement (doi:10.1039/c4dt01869a), 2014-01-01
Supplement: c4dt01869a1.pdf [file c4dt01869a1.pdf]

**Electronic Supplementary Information (ESI)**

**Partial alkali-metal ion extraction from  $\text{K}_{0.8}(\text{Li}_{0.27}\text{Ti}_{1.73})\text{O}_4$  using PTFE as an extraction reagent**

Tadashi C. Ozawa\*<sup>ab</sup> and Takayoshi Sasaki<sup>ab</sup>

*<sup>a</sup> International Center for Materials Nanoarchitectonics (WPI-MANA), National Institute for Materials Science (NIMS), 1-1 Namiki, Tsukuba, Ibaraki 305-0044, Japan*

*<sup>b</sup> CREST, Japan Science and Technology Agency (JST), 4-1-8 Honcho, Kawaguchi, Saitama 332-0012, Japan*

E-mail: ozawa.tadashi@nims.go.jp.

## S1. Crystal structure of $K_{0.8}(Li_{0.27}Ti_{1.73})O_4$

The crystal structure of  $K_{0.8}(Li_{0.27}Ti_{1.73})O_4$  consists of edge-shared  $Li^+$ -substituted  $TiO_6$  octahedral layers interspersed with  $K^+$ .

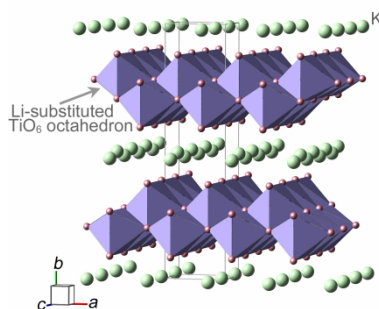

Fig. S1. Schematic drawing of the crystal structure of  $K_{0.8}(Li_{0.27}Ti_{1.73})O_4$  based on the previously published data.<sup>1,2</sup>

## S2. Optimization of the reaction duration to decompose PTFE derivatives from PTFE\_0.6\_Ar

PTFE\_0.6\_Ar was re-heated at 350 °C under flowing air in order to oxidatively decompose PTFE derivatives in PTFE\_0.6\_Ar. After 24 h of re-heating, the color of the product turned white (Fig. S2a inset) indicating the successful decomposition of the PTFE derivatives. When the reaction duration was extended over 24 h, the intensities of the powder X-ray diffraction (XRD) peaks attributed to the alkali-metal derivatives ( $K_2CO_3$  and  $LiF$ ) decreased significantly as shown in Fig. S2a. Furthermore, the lattice parameters of the re-heated products got closer to those of the pristine  $K_{0.8}(Li_{0.27}Ti_{1.73})O_4$  as the reaction duration was increased as shown in Fig. S2b. These results indicate that the extracted alkali-metal ions intercalated back into the phase when the re-heating duration in air was too long. Therefore,

24 h was considered as the optimum duration to decompose the PTFE derivatives in PTFE\_0.6\_Ar.

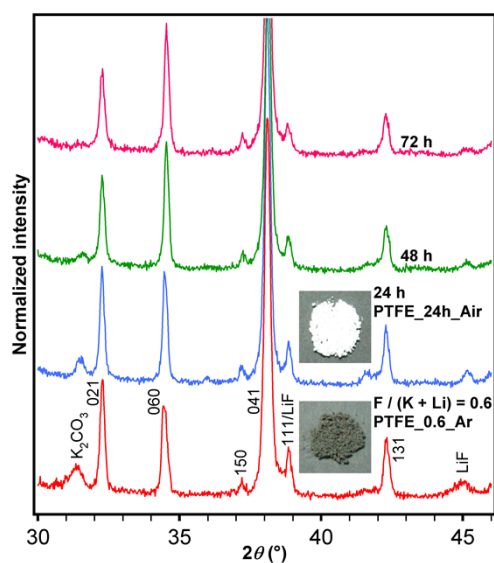

**Fig. S2a.** Powder XRD profiles of PTFE\_0.6\_Ar and that re-heated at 350 °C under flowing air for 24 (PTFE\_24h\_Air), 48 and 72 h. (Inset) Photographs of PTFE\_0.6\_Ar and that re-heated at 350 °C in air for 24 h.

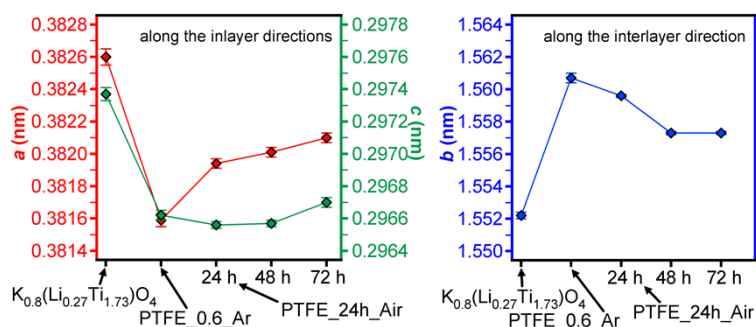

**Fig. S2b.** Refined lattice parameters of  $K_{0.8}(Li_{0.27}Ti_{1.73})O_4$ , PTFE\_0.6\_Ar and that re-heated at 350 °C under flowing air for 24 (PTFE\_24h\_Air), 48 and 72 h.

### S3. Dehydration and phase transformations of $K^+$ - and/or $Li^+$ -extracted $K_{0.8}(Li_{0.27}Ti_{1.73})O_4$ characterized by powder XRD

We have studied the dehydration and phase transformation behaviors of KTLO\_Washed\_RT and PTFE\_Washed\_RT by heating them and characterizing their powder XRD patterns.

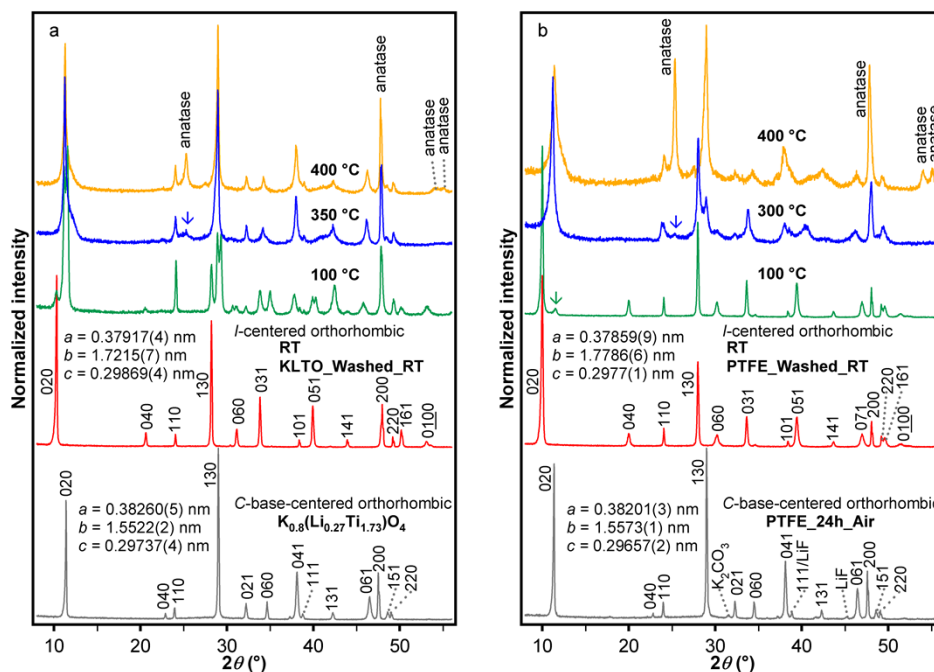

**Fig. S3.** Powder XRD profiles of (a)  $K_{0.8}(Li_{0.27}Ti_{1.73})O_4$  and that washed in water and dried or heated in air at selected temperatures and (b) PTFE\_24h\_Air and that washed in water and dried or heated in air at selected temperatures.

### S4. Further characterizations of the dehydration and phase transformation behaviors of PTFE\_Washed\_RT by thermogravimetric analysis, powder XRD and chemical analysis of PTFE\_Washed\_RT heated at 1000 °C

We have also studied the sample weight and crystal structure changes with respect to heating temperatures in order to further understand the dehydration behavior of PTFE\_Washed\_RT. The thermogravimetric (TG) profile of PTFE\_Washed\_RT is shown in Fig. S4a. The TG analysis was performed using a Rigaku Thermo plus TG8120 at a heating rate of 10 °C min<sup>-1</sup> under 20 mL min<sup>-1</sup> flow of air. Approximately 8% weight loss up to around 200 °C and a further 2% loss up to around 370 °C are attributed to overlapped two-step dehydration. The first step (I) of the weight loss is attributed to the evaporation of interlayer H<sub>2</sub>O, represented by  $w$  in the chemical equation (3). The second step (II) is attributed to the loss of H<sup>+</sup>, which partially replaced K<sup>+</sup> and Li<sup>+</sup> during washing in water, represented by  $\nu+t$  in the chemical equation (3); such loss of H<sup>+</sup> is expected to take place in the form of H<sub>2</sub>O like the cases of the H<sup>+</sup>-exchanged layered metal oxide compounds.<sup>2, 3</sup> Between 370 and 700 °C (region III in Fig. S4a), the weight change is very small. The results of the XRD (Figs. S3b and S4b) indicate that the sample in this temperature range consists of the partially K<sup>+</sup>- and Li<sup>+</sup>-extracted and H<sup>+</sup>-exchanged K<sub>0.8</sub>(Li<sub>0.27</sub>Ti<sub>1.73</sub>)O<sub>4</sub>, anatase-type TiO<sub>2</sub>, spinel-type Li<sub>1.33</sub>Ti<sub>1.67</sub>O<sub>2</sub><sup>4</sup> and a trace amount of hollandite-type K<sub>3x</sub>(Li<sub>x</sub>Ti<sub>8-x</sub>)O<sub>16</sub><sup>1</sup>. Above 700 °C, the sample weight again decreased approximately 0.5% up to 1000 °C.

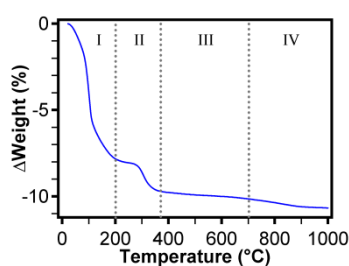

**Fig. S4a.** TG curve of PTFE\_Washed\_RT.

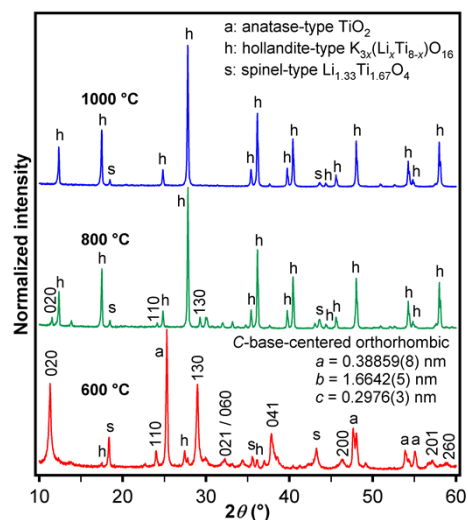

**Fig. S4b.** Powder XRD profiles of PTFE\_Washed\_RT heated at 600, 800 and 1000 °C. The indices are for the partially  $K^+$ - and  $Li^+$ -extracted and  $H^+$ -exchanged  $K_{0.8}(Li_{0.27}Ti_{1.73})O_4$ .

The elemental composition of PTFE\_Washed\_RT heated at 1000 °C is shown in Table S1. The contents of K, Li and F in the sample heated at 1000 °C decreased with respect to those in PTFE\_Washed\_RT (Table 1), consistent with the weight loss above 700 °C in the TG analysis (Fig. S4a). PTFE\_Washed\_RT heated at 800 °C consists of hollandite-type  $K_{3x}(Li_xTi_{8-x})O_{16}$ , spinel-type  $Li_{1.33}Ti_{1.67}O_2$  and a trace amount of the partially  $K^+$ - and  $Li^+$ -extracted and  $H^+$ -exchanged  $K_{0.8}(Li_{0.27}Ti_{1.73})O_4$ ; no trace of anatase-type  $TiO_2$  was observed (Fig. S4b). Furthermore, PTFE\_Washed\_RT heated at 1000 °C consists of hollandite-type  $K_{3x}(Li_xTi_{8-x})O_{16}$  and spinel-type  $Li_{1.33}Ti_{1.67}O_2$ ; and no trace of the partially  $K^+$ - and  $Li^+$ -extracted and  $H^+$ -exchanged  $K_{0.8}(Li_{0.27}Ti_{1.73})O_4$  was observed. This result is in clear contrast to the case of the complete alkali-metal ion-extracted  $K_{0.8}(Li_{0.27}Ti_{1.73})O_4$ . When all the alkali-metal ions were completely extracted from  $K_{0.8}(Li_{0.27}Ti_{1.73})O_4$  by reaction with PTFE at the ratio of  $F / (K + Li) = 3.4$  in mol at 400 °C, it was transformed into brookite-type  $TiO_2$ .<sup>5</sup> A sign of partial rutile-type  $TiO_2$  formation was observed when it was further heated at 750 °C

in air. At 800 °C, XRD peaks of a trace amount of hollandite-type titania<sup>6, 7</sup> were observed, but this was completely transformed into single phase rutile-type TiO<sub>2</sub> above 800 °C.<sup>5</sup>

**Table S1. Analytically Determined Molar Elemental Composition<sup>\*1</sup> of PTFE Washed RT heated at 1000 °C**

|                                  | K    | Li   | Ti   | F               |
|----------------------------------|------|------|------|-----------------|
| PTFE Washed RT heated at 1000 °C | 0.37 | 0.24 | 1.73 | 0 <sup>*2</sup> |

\*<sup>1</sup> All the compositions are normalized to 1.73 mol of Ti.

\*<sup>2</sup> Within the limits of the analysis.

## References

1. R. S. Roth, H. S. Parker and W. S. Brower, *Mater. Res. Bull.*, 1973, **8**, 327-332.
2. T. Sasaki, F. Kooli, M. Iida, Y. Michiue, S. Takenouchi, Y. Yajima, F. Izumi, B. C. Chakoumakos and M. Watanabe, *Chem. Mater.*, 1998, **10**, 4123-4128.
3. T. Sasaki, M. Watanabe, Y. Michiue, Y. Komatsu, F. Izumi and S. Takenouchi, *Chem. Mater.*, 1995, **7**, 1001-1007.
4. K. Kataoka, Y. Takahashia, N. Kijima, J. Akimoto and K. Ohshima, *J. Phys. Chem. Solids*, 2008, **69**, 1454-1456.
5. T. C. Ozawa and T. Sasaki, *Inorg. Chem.*, 2010, **49**, 3044-3050.
6. M. Latroche, L. Brohan, R. Marchand and M. Tournoux, *J. Solid State Chem.*, 1989, **81**, 78-82.
7. T. Sasaki, M. Watanabe and Y. Fujiki, *Acta Crystallogr., Sect. B*, 1993, **49**, 838-841.
